# Supplementary material for: Noninvasive electrophysiological imaging identifies 4D uterine peristalsis patterns in subjects with normal menstrual cycles and patients with endometriosis
Source: Research Square preprint supplement (doi:10.21203/rs.3.rs-2432192/v1), 2023-03-08
Supplement: Supplementary file 2 [file 8fa0dea2d0ba30301a231047.pdf]

**Supplemental Table 1. Participant characteristics**

|                                  |                       |
|----------------------------------|-----------------------|
| Age, years                       | 29.5 (22 - 37)        |
| Body mass index                  | 28.57 (19.79 – 48.70) |
| Race                             |                       |
| White                            | 17 (77.3%)            |
| Black or African American        | 3 (13.6%)             |
| Middle Eastern or North African  | 1 (4.5%)              |
| Asian                            | 1 (4.5%)              |
| OBGYN history                    |                       |
| Gravida                          | 0.38 (0 – 3)          |
| Parity                           | 0.24 (0 - 2)          |
| Abortion-Spontaneous or elective | 0.14 (0 - 3)          |
| Prior hysteroscopy               | 1 (4.5%)              |
| Prior C-Section                  | 1 (4.5%)              |
| Prior Salpingectomy              | 2 (9.1%)              |
| Fallopian tube removed           | 2 (9.1%)              |
| Confirmed tubal patency          | 2 (9.1%)              |
| Health conditions                |                       |
| Chronic health condition         | 16 (72.7%)            |
| Asthma                           | 3 (13.6%)             |
| Anxiety or depression            | 13 (59.1%)            |

Data are presented as n (%) or average (range).
